# Supplementary material
Source: PubMed Central journal article supplement (PMC3717298)
Supplement: NIHMS263031-supplement-1_si_001.pdf [file NIHMS263031-supplement-1_si_001.pdf]

## Supplemental Figure

Selected tandem mass spectra for labeled peptides. (A) P49773 Protein kinase C inhibiting protein 1 (**144Y**): M]VVNEGSDGGQSVY#HVHLHVLGGR; (B) P06733  $\alpha$ -Enolase (**144C**): S]GETEDTFIADLVVGLC#TGQIK\*; (C) P52948 Nup 98-Nuclear pore complex protein (**42K**): LYQTPLELK#LK\*; (D) P63313 Thymosin beta-10 (**43K**): A]DK#PDMGEIASFDK\*AK\*; (E) P05783 Cytokeratin-18 (**16M**): Y]ALQM#EQLNGILLHLESELAQTR.

**Note 1:** In the peptide amino acid sequence: “]” and “\*” indicate the iTRAQ tag at the Nt and Lys residues, respectively; “#” indicates the additional amino acid modification.

**Note 2:** Fragment **b/y** ions that carry the modification and immediately adjacent to the modification are provided in boxes; the modification site is provided in *bold*.

**Note 3:** In tandem mass spectra: “o” represents ions that lost one molecule of H<sub>2</sub>O; “\*” represents ions that lost one molecule of NH<sub>3</sub>; “T” represents internal fragments.

**Note 4:** In tandem mass spectrum **A**, the site of modification (**y<sub>11</sub>**) could not be assigned. However, the presence of Nt sequence ions (**b<sub>1</sub>**, **b<sub>2</sub>**, **b<sub>3</sub>**, **b<sub>4</sub>**, **b<sub>5</sub>**), of **y<sub>5</sub>**, **y<sub>6</sub>**, **y<sub>7</sub>**, **y<sub>8</sub>**, **y<sub>9</sub>**, and **y<sub>10</sub>** ion series before the modification, and of good Sequest scores, confirmed the iTRAQ labeling of the Tyr residue. In tandem mass spectra **2B/C/D/E**, the precise site of modification was assigned. The **b/y** ions adjacent and at the modification site are provided in boxes, the modification site being provided in *bold*.

#5951-5951 RT:76.75-76.75 NL:2.81E1

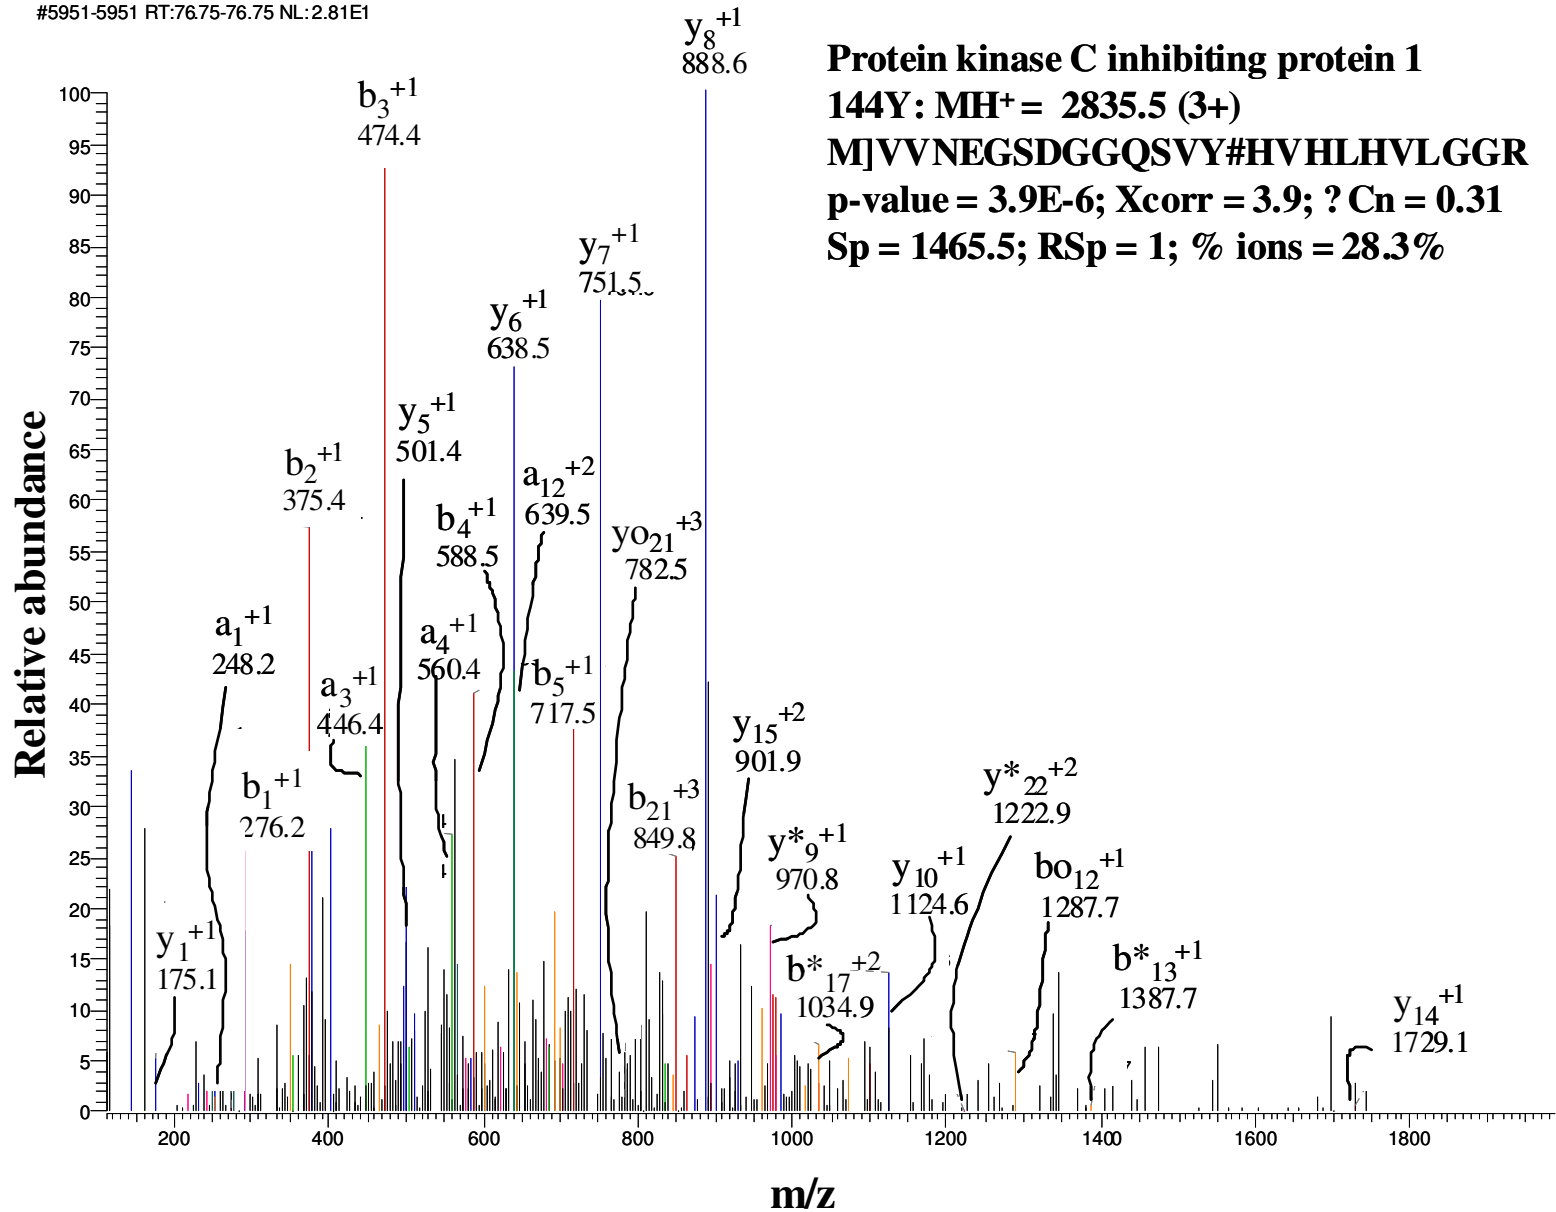

#15713-15713 RT:189.14-189.14 NL:1.29E2

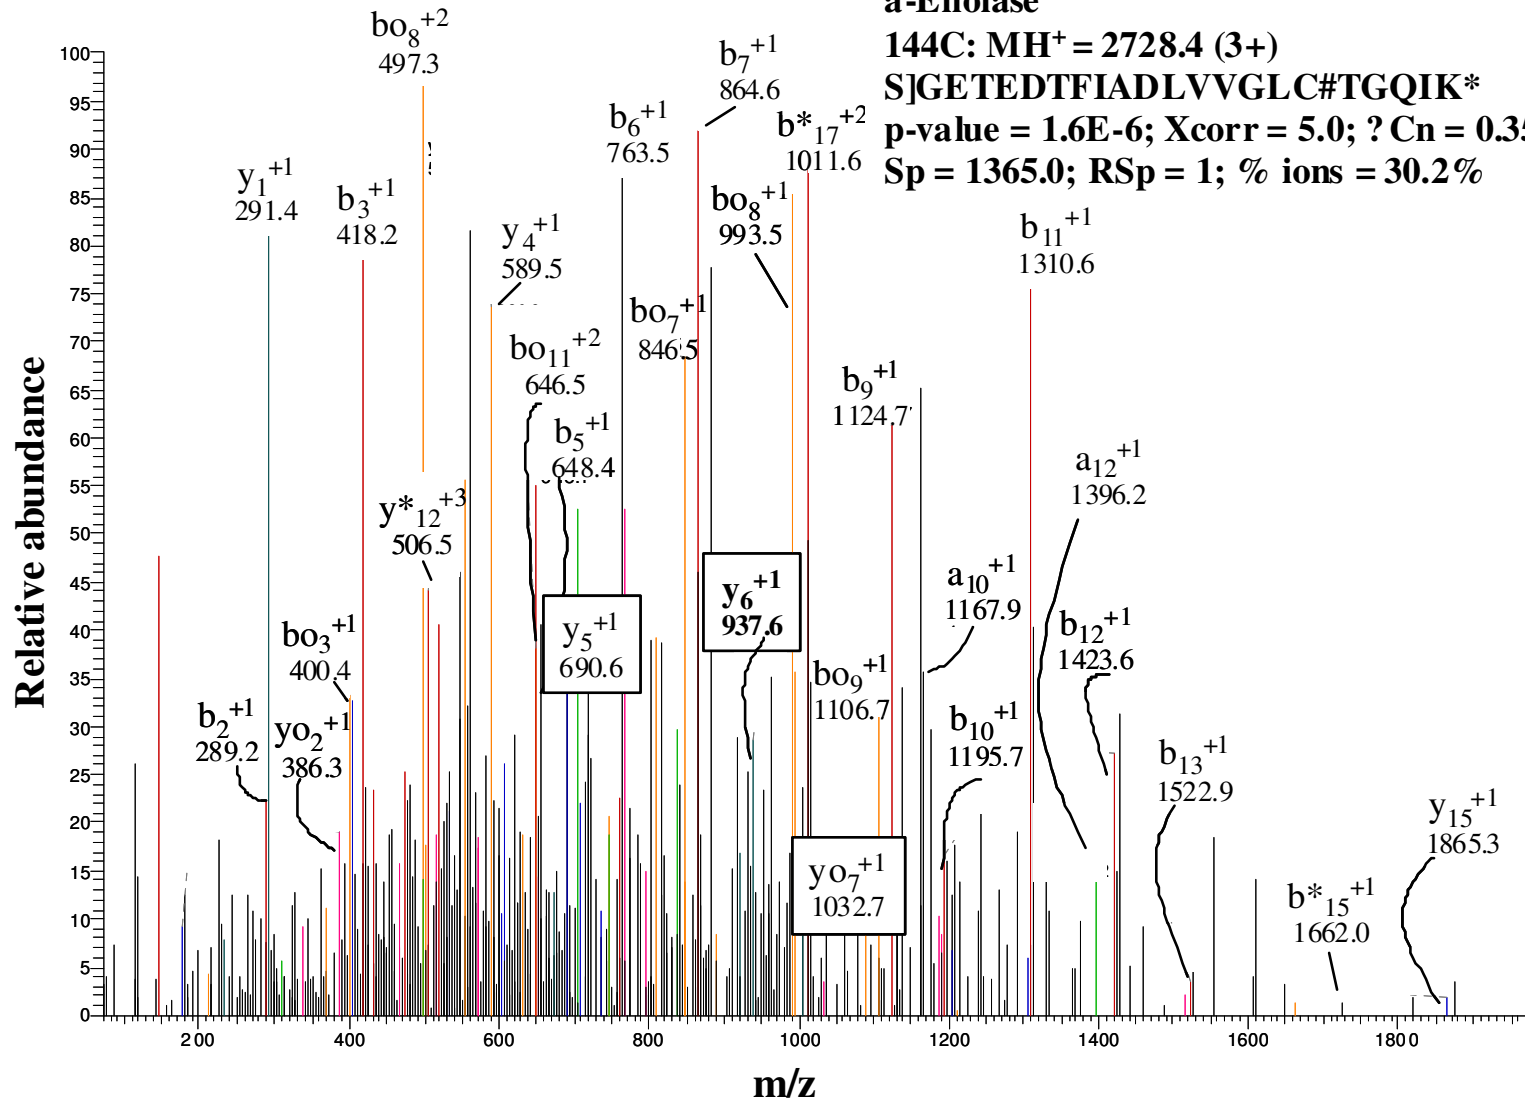

Figure B

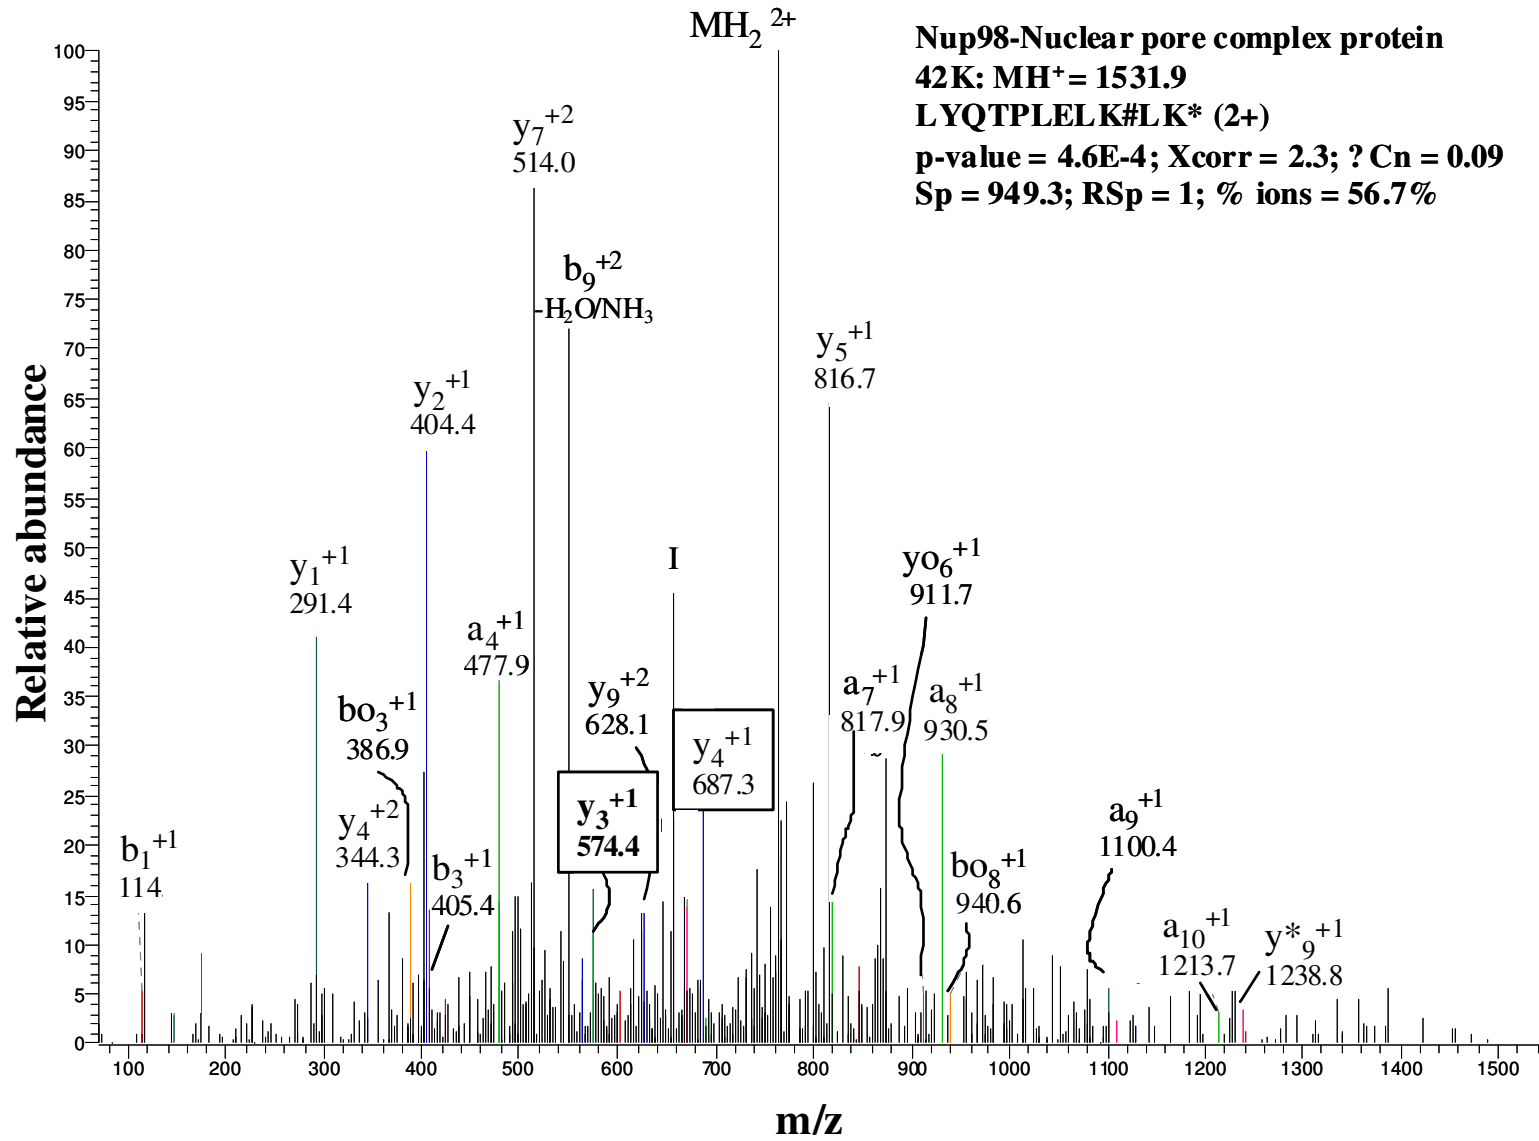

#6097-6097 RT:7620-7620 NL: 7.14E2

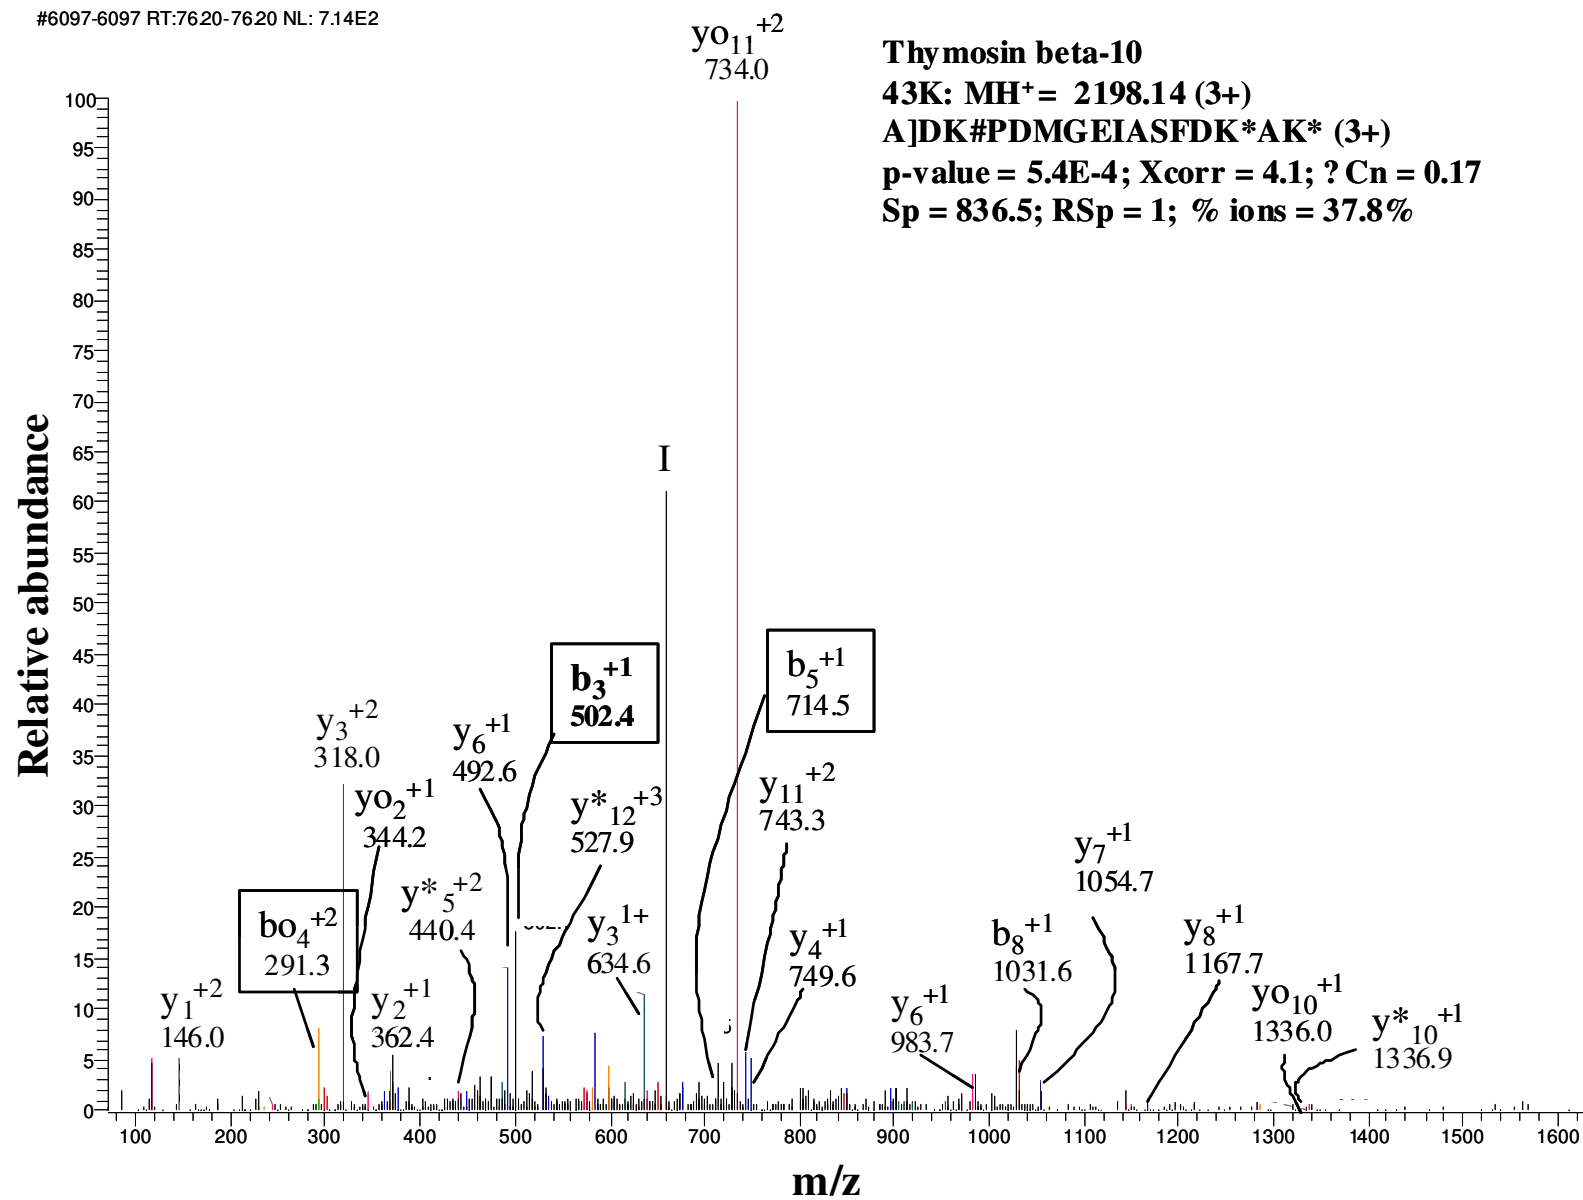

#16756-16756 RT201.80-201.80 NL: 2.62E2

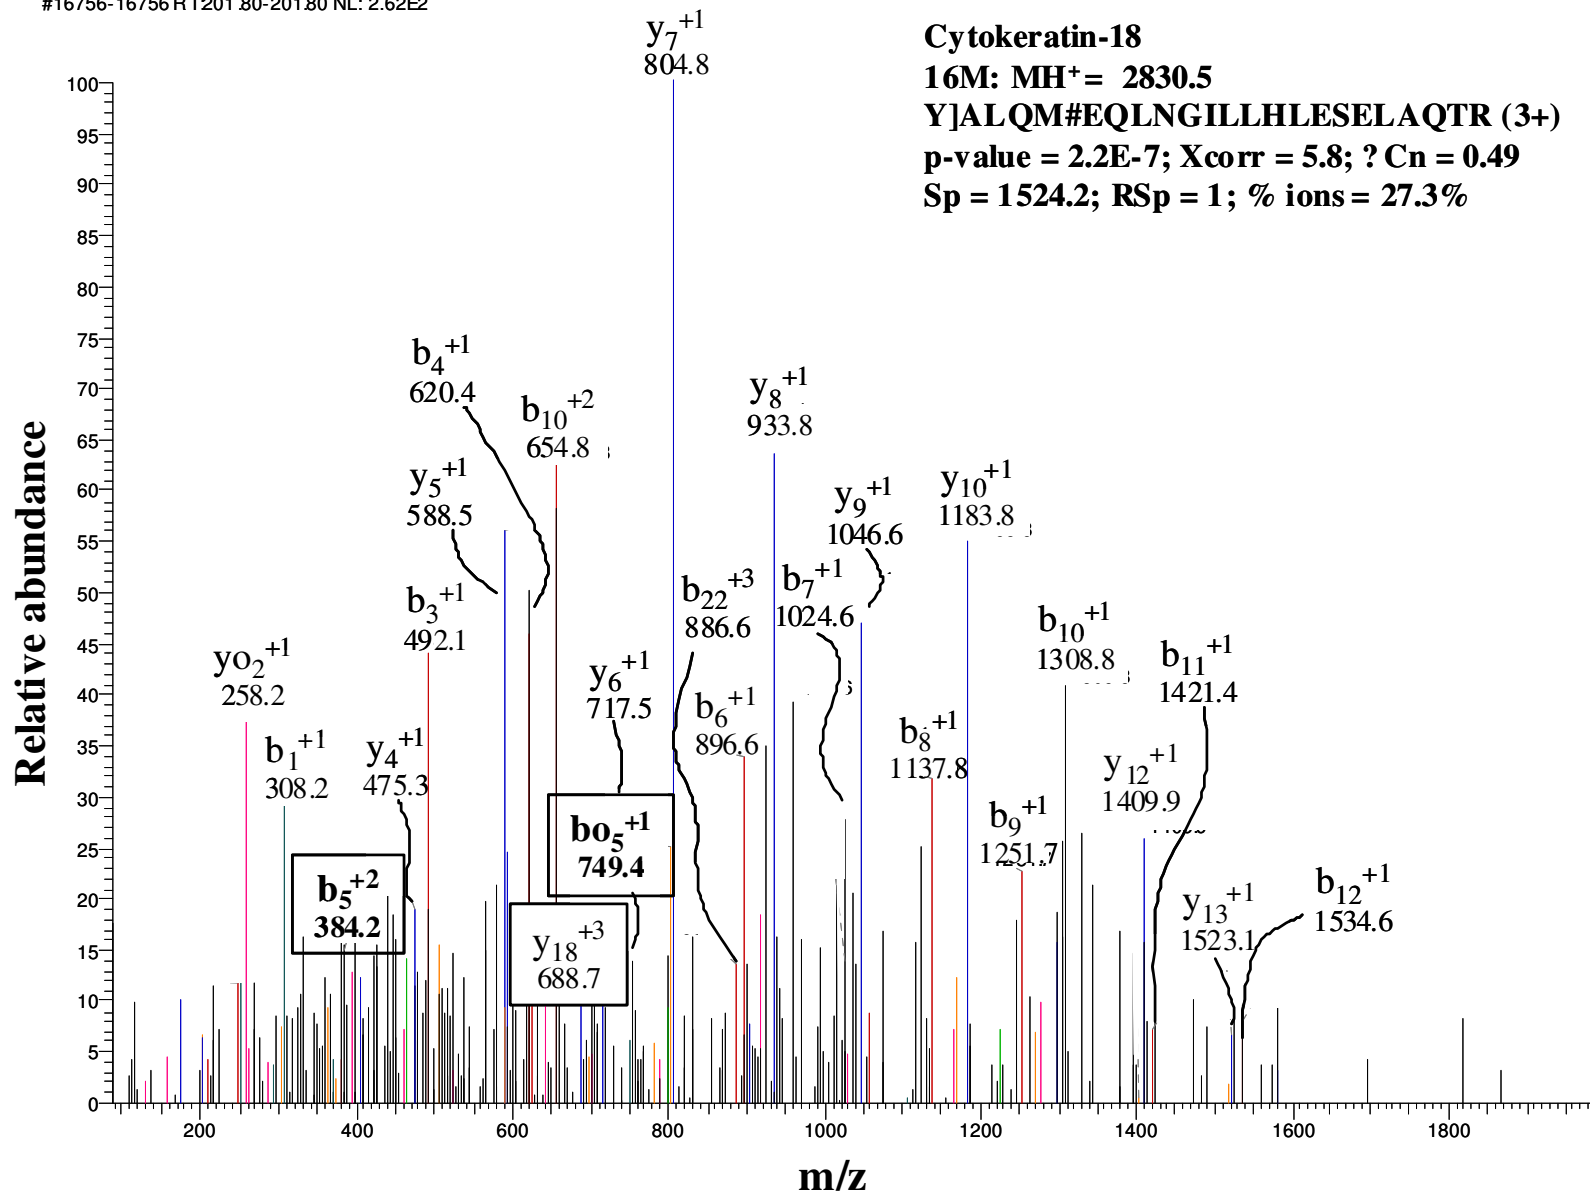

Figure E
